# Supplementary material for: Genome sequencing defines phylogeny and spread of methicillin-resistant Staphylococcus aureus in a high transmission setting
Source: HighWire-hosted journal article supplement (doi:10.1101/gr.174730.114), 2014-12-09
Supplement: Supplemental_Table_1.xlsx [file Supplemental_Table_1.xlsx]

## Sheet: Sheet1
Isolate	Ward/Staff	Date_of_isolation	Study	ENA Sample acession	ENA Run Accession	Sanger ID	Total Assembly Length (bp)	Number of Contigs	Average Contig Length (bp)	Largest Contig (bp)	N50 (bp)	% of TW20 chromosome mapped	Mean coverage
T126_N3	Adult ICU	2008-04-04	This study	ERS007946	ERR023525	4752_7#1	2956212	114	25931.7	156465	71524	97.7183	70.7807
T126_N12	Adult ICU	2008-05-05	This study	ERS007955	ERR023526	4752_7#10	2952151	84	35144.7	200152	97052	97.6825	65.887
T126_N13	Adult ICU	2008-05-09	This study	ERS007956	ERR023527	4752_7#11	2956502	48	61593.8	322332	196136	98.0115	130.087
T126_N6	Adult ICU	2008-04-14	This study	ERS007949	ERR023531	4752_7#4	2957055	39	75821.9	305028	179052	97.8471	112.164
T126_N7	Adult ICU	2008-04-18	This study	ERS007950	ERR023532	4752_7#5	2953842	39	75739.5	322830	206553	97.7637	102.65
T126_N9	Adult ICU	2008-04-25	This study	ERS007952	ERR023534	4752_7#7	2955777	71	41630.7	241618	85755	97.6069	67.843
T126_N10	Adult ICU	2008-04-28	This study	ERS007953	ERR023535	4752_7#8	2951854	128	23061.4	179626	62095	97.6686	62.4165
T126_N11	Adult ICU	2008-05-02	This study	ERS007954	ERR023536	4752_7#9	2951221	64	46112.8	354887	136279	97.6976	71.8468
T358_N2	Peadiatric ICU	2008-05-27	This study	ERS007969	ERR033070	4925_6#1	3055905	55	55561.9	248650	161997	99.6275	140.334
T358_N1	Peadiatric ICU	2008-05-24	This study	ERS007970	ERR033074	4925_6#2	3039715	87	34939.2	203188	73442	99.3971	125.375
T341_T1	Peadiatric ICU	2008-05-22	This study	ERS007971	ERR033075	4925_6#3	2990330	51	58633.9	458386	120634	99.318	180.161
T335_A2	Adult ICU	2008-05-23	This study	ERS007972	ERR033076	4925_6#4	2943628	54	54511.6	241998	144053	98.8038	139.645
T330_T1	Adult ICU	2008-05-19	This study	ERS007973	ERR033077	4925_6#5	3002020	175	17154.4	135656	36350	99.0433	105.4
T327_N2	Adult ICU	2008-05-20	This study	ERS007974	ERR033078	4925_6#6	2947097	60	49118.3	225072	157358	98.9306	242.613
T322_N2	Peadiatric ICU	2008-05-27	This study	ERS007975	ERR033079	4925_6#7	3056153	56	54574.2	701970	147146	99.4756	125.106
T303_N3	Adult ICU	2008-05-14	This study	ERS007976	ERR033080	4925_6#8	2968757	44	67471.8	405511	190852	98.881	72.6793
T301_T2	Adult ICU	2008-05-12	This study	ERS007977	ERR033081	4925_6#9	2945853	54	54552.8	281465	158948	98.8431	159.344
T232_T1	Adult ICU	2008-04-24	This study	ERS007990	ERR023863	4925_7#10	2958102	34	87003	556825	190903	98.9255	118.369
T230_C3	Peadiatric ICU	2008-05-02	This study	ERS007991	ERR023864	4925_7#11	2997117	46	65154.7	353249	143478	99.3944	152.469
T225_N1	Peadiatric ICU	2008-04-23	This study	ERS007992	ERR023865	4925_7#12	3005374	115	26133.7	134329	51619	99.4129	125.921
T271_N4	Adult ICU	2008-05-12	This study	ERS007982	ERR023866	4925_7#2	2963086	38	77975.9	354135	177716	99.0913	190.025
T271_C1	Adult ICU	2008-05-01	This study	ERS007983	ERR023867	4925_7#3	3019608	54	55918.7	333740	168645	99.5646	183.548
T270_U1	Adult ICU	2008-05-01	This study	ERS007984	ERR023868	4925_7#4	2943793	53	55543.3	279587	158986	98.7282	103.931
T249_N3	Peadiatric ICU	2008-04-30	This study	ERS007985	ERR023869	4925_7#5	3021747	48	62953.1	301079	168676	99.6544	184.556
T249_T1	Peadiatric ICU	2008-04-26	This study	ERS007986	ERR023870	4925_7#6	3050423	59	51702.1	280182	134573	99.4043	118.839
T234_N4	Adult ICU	2008-05-01	This study	ERS007987	ERR023871	4925_7#7	2956576	39	75809.6	541488	206545	99.0196	81.2188
T234_W2	Adult ICU	2008-04-26	This study	ERS007988	ERR023872	4925_7#8	2997078	43	69699.5	453694	159062	99.4852	89.774
T232_N2	Adult ICU	2008-04-26	This study	ERS007989	ERR023873	4925_7#9	2959017	37	79973.4	484180	206543	98.8729	106.676
T10_N11	Peadiatric ICU	2008-04-02	This study	ERS008003	ERR023877	4925_8#11	3016820	70	43097.4	218368	91725	99.3986	172.52
T9_N9	Peadiatric ICU	2008-03-29	This study	ERS008004	ERR023878	4925_8#12	2994981	66	45378.5	457351	100494	99.2591	80.5198
T21_N6	Peadiatric ICU	2008-03-17	This study	ERS007994	ERR023879	4925_8#2	3000232	50	60004.6	291188	192734	99.4771	226.15
T20_N2	Peadiatric ICU	2008-03-03	This study	ERS007995	ERR023880	4925_8#3	3026853	59	51302.6	354360	162038	99.4505	127.358
T20_N1	Peadiatric ICU	2008-02-29	This study	ERS007996	ERR023881	4925_8#4	2997841	72	41636.7	280083	109150	99.2285	99.9951
T12_N28	Peadiatric ICU	2008-05-31	This study	ERS007997	ERR023882	4925_8#5	3041500	81	37549.4	280084	86379	99.3008	96.588
T12_N24	Peadiatric ICU	2008-05-19	This study	ERS007998	ERR023883	4925_8#6	3074315	69	44555.3	354436	136390	99.448	130.721
T12_N1	Peadiatric ICU	2008-02-27	This study	ERS007999	ERR023884	4925_8#7	3061942	58	52792.1	492927	220175	99.4752	119.926
T9_N3	Peadiatric ICU	2008-03-05	This study	ERS008005	ERR023888	4950_2#1	3004004	75	40053.4	278937	89207	99.3723	220.479
T223_A1	Peadiatric ICU	2008-04-22	This study	ERS008015	ERR023899	4950_3#1	3007393	77	39057.1	280073	79505	99.4082	168.826
T183_N2	Peadiatric ICU	2008-04-26	This study	ERS008024	ERR023900	4950_3#10	3038537	81	37512.8	186258	86584	99.4223	100.678
T182_N1	Peadiatric ICU	2008-04-10	This study	ERS008025	ERR023901	4950_3#11	3010999	59	51033.9	281111	108994	99.4336	130.939
T178_N3	Peadiatric ICU	2008-04-18	This study	ERS008026	ERR023902	4950_3#12	3015774	100	30157.7	145172	69456	99.3611	132.964
T197_N3	Peadiatric ICU	2008-04-23	This study	ERS008016	ERR023903	4950_3#2	3021464	49	61662.5	547511	167547	99.3688	160.679
T197_N1	Peadiatric ICU	2008-04-16	This study	ERS008017	ERR023904	4950_3#3	3000308	74	40544.7	280253	101409	99.342	165.29
T194_N4	Peadiatric ICU	2008-04-24	This study	ERS008018	ERR023905	4950_3#4	3047543	157	19411	232911	78753	99.2537	92.9409
T194_N1	Peadiatric ICU	2008-04-15	This study	ERS008019	ERR023906	4950_3#5	3038109	75	40508.1	280184	101444	99.2918	119.243
T192_T3	Adult ICU	2008-04-24	This study	ERS008020	ERR023907	4950_3#6	2942094	56	52537.4	218247	108994	98.6476	92.333
T188_N3	Peadiatric ICU	2008-05-29	This study	ERS008021	ERR023908	4950_3#7	2927921	75	39038.9	159288	85900	98.9138	133.358
T188_N1	Peadiatric ICU	2008-04-12	This study	ERS008022	ERR023909	4950_3#8	2930354	76	38557.3	172195	71667	98.9921	96.5239
T183_N8	Peadiatric ICU	2008-05-17	This study	ERS008023	ERR023910	4950_3#9	3033499	79	38398.7	206502	78626	99.35	108.166
T56_H1	Nurse	2008-03-07	This study	ERS008060	not found	5150_8#1	2992474	48	62343.2	291167	141379	99.4186	141.875
T241_N2	Nurse	2008-04-25	This study	ERS007966	not found	5150_8#10	3059931	62	49353.7	292134	141995	99.2857	67.1157
T353_N1	Nurse	2008-05-23	This study	ERS007967	not found	5150_8#11	2957333	53	55798.7	238677	151788	98.879	97.1811
T126_N19	Adult ICU	2008-05-30	This study	ERS007968	not found	5150_8#12	2955816	143	20670	175392	43593	98.536	68.0137
T126_N15	Adult ICU	2008-05-16	This study	ERS007958	not found	5150_8#2	2955480	36	82096.7	419799	190888	98.985	98.5446
T126_N16	Adult ICU	2008-05-19	This study	ERS007959	not found	5150_8#3	2960883	67	44192.3	260394	152519	99.0129	124.674
T126_N17	Adult ICU	2008-05-23	This study	ERS007960	not found	5150_8#4	2958439	35	84526.8	356035	208864	98.9387	111.297
T126_N18	Adult ICU	2008-05-26	This study	ERS007961	not found	5150_8#5	2959022	248	11931.5	81526	25836	98.8882	90.1199
T59_N1	Nurse	2008-03-07	This study	ERS007962	not found	5150_8#6	2831131	64	44236.4	161389	104631	96.6569	48.4744
T59_N2	Nurse	2008-04-25	This study	ERS007963	not found	5150_8#7	2841184	41	69297.2	277080	168755	98.8048	122.11
T59_N3	Nurse	2008-05-23	This study	ERS007964	not found	5150_8#8	2841374	36	78927.1	527189	144495	98.1899	95.9733
T40_N1	Nurse	2008-03-07	This study	ERS007965	not found	5150_8#9	2995921	54	55480	211728	101382	99.0956	75.2022
T126_N1	Adult ICU	2008-03-28	This study	ERS008037	not found	5227_1#11	2956941	51	57979.2	436631	129789	98.7512	90.1108
T159_N8	Peadiatric ICU	2008-04-28	This study	ERS008028	not found	5227_1#2	3050749	60	50845.8	301022	178768	99.2903	80.2127
T159_N4	Peadiatric ICU	2008-04-14	This study	ERS008029	not found	5227_1#3	3063386	78	39274.2	226242	103598	99.3644	144.082
T156_W3	Peadiatric ICU	2008-04-10	This study	ERS008032	not found	5227_1#6	2998087	78	38437	198291	82986	99.2098	74.7724
T137_N12	Peadiatric ICU	2008-05-31	This study	ERS008033	not found	5227_1#7	3050536	79	38614.4	202740	100091	99.1254	64.6846
T137_N3	Peadiatric ICU	2008-05-01	This study	ERS008034	not found	5227_1#8	3055160	59	51782.4	295546	164622	99.4204	128.312
T126_N20	Adult ICU	2008-05-31	This study	ERS008035	not found	5227_1#9	2960987	42	70499.7	437583	199710	98.9277	138.554
T92_T1	Adult ICU	2008-03-18	This study	ERS008048	not found	5227_2#10	2964302	109	27195.4	185909	72810	98.9735	72.1519
T77_N2	Adult ICU	2008-03-15	This study	ERS008050	not found	5227_2#12	3000320	256	11720	132377	28011	98.7969	83.1267
T107_U2	Adult ICU	2008-03-24	This study	ERS008040	not found	5227_2#2	2923067	75	38974.2	213129	103754	98.2872	58.013
T105_N1	Peadiatric ICU	2008-03-21	This study	ERS008041	not found	5227_2#3	3019700	98	30813.3	198460	103600	99.0419	67.6781
T102_T2	Adult ICU	2008-03-24	This study	ERS008042	not found	5227_2#4	2923695	58	50408.5	329458	109342	98.3247	54.0441
T99_N7	Adult ICU	2008-04-05	This study	ERS008043	not found	5227_2#5	2971021	56	53053.9	335329	127844	98.8011	85.0529
T95_N1	Adult ICU	2008-03-18	This study	ERS008046	not found	5227_2#8	2922825	99	29523.5	192400	85034	98.1719	51.5288
T92_N4	Adult ICU	2008-03-22	This study	ERS008047	not found	5227_2#9	2961378	63	47006	246357	109390	98.6421	65.7811
T65_N2	Peadiatric ICU	2008-03-11	This study	ERS008058	ERR033821	5704_7#10	3032665	65	46656.4	351770	115492	98.8652	100.787
T35_N4	Peadiatric ICU	2008-03-17	This study	ERS008059	ERR033822	5704_7#11	2974409	57	52182.6	279105	125777	98.006	78.2876
T35_N2	Peadiatric ICU	2008-03-10	This study	ERS008061	ERR033823	5704_7#12	2951384	61	48383.3	197844	121930	97.5069	110.138
T126_N4	Adult ICU	2008-04-07	This study	ERS007947	ERR033824	5704_7#2	2939855	47	62550.1	352832	176446	97.6294	113.555
T126_N5	Adult ICU	2008-04-11	This study	ERS007948	ERR033825	5704_7#3	2944484	48	61343.4	402636	158993	97.5273	102.206
T126_N8	Adult ICU	2008-04-21	This study	ERS007951	ERR033826	5704_7#4	2942638	47	62609.3	353279	136824	97.6987	129.952
T126_N14	Adult ICU	2008-05-12	This study	ERS007957	ERR033827	5704_7#5	2939464	45	65321.4	353317	190760	97.3541	106.805
T99_N5	Adult ICU	2008-03-31	This study	ERS008044	ERR033828	5704_7#6	2946958	54	54573.3	280264	135247	97.8312	116.422
T87_C1	Adult ICU	2008-03-15	This study	ERS008049	ERR033829	5704_7#7	2970094	63	47144.3	280192	112376	97.7537	57.0496
T69_N1	Peadiatric ICU	2008-03-10	This study	ERS008054	ERR033830	5704_7#8	2989404	45	66431.2	352412	162982	97.672	131.379
T65_N3	Peadiatric ICU	2008-03-14	This study	ERS008057	ERR033831	5704_7#9	3034091	71	42733.7	280031	142811	99.0541	114.026
T95_N2	Adult ICU	2008-03-20	This study	ERS008045	ERR033833	5704_8#1	2913394	62	46990.2	267289	92566	97.3777	269.456
T73_N1	Peadiatric ICU	2008-03-11	This study	ERS008051	ERR033834	5704_8#2	2976058	56	53143.9	278884	125853	99.0157	283.594
T71_N3	Adult ICU	2008-03-20	This study	ERS008052	ERR033835	5704_8#3	2947443	57	51709.5	323507	135214	97.8105	298.228
T71_N2	Adult ICU	2008-03-13	This study	ERS008053	ERR033836	5704_8#4	2948315	59	49971.4	280216	135153	98.1089	416.302
T28_C2	Adult ICU	2008-03-07	This study	ERS008062	ERR033837	5704_8#5	2921338	51	57281.1	521241	136118	97.7847	301.543
T126_N1_C1	Adult ICU	2008-03-28	This study	ERS023843	ERR035962	5985_1#10	2938435	42	69962.7	354169	158989	98.2379	359.804
T126_N1_C2	Adult ICU	2008-03-28	This study	ERS023844	ERR035963	5985_1#11	2947238	42	70172.3	353807	202843	98.1577	364.891
T126_N1_C3	Adult ICU	2008-03-28	This study	ERS023845	ERR035964	5985_1#12	2943032	44	66887.1	353871	190856	98.3568	424.509
T126_N1_C4	Adult ICU	2008-03-28	This study	ERS023846	ERR035974	5985_2#1	2948772	40	73719.3	375557	190859	97.9127	402.278
T126_N1_C13	Adult ICU	2008-03-28	This study	ERS023855	ERR035975	5985_2#10	2949022	44	67023.2	261325	159049	98.0118	395.593
T126_N1_C14	Adult ICU	2008-03-28	This study	ERS023856	ERR035976	5985_2#11	2948221	41	71907.8	254962	176929	98.0517	413.789
T126_N1_C5	Adult ICU	2008-03-28	This study	ERS023847	ERR035977	5985_2#2	2942122	40	73553.1	353214	192722	97.7882	455.913
T126_N1_C6	Adult ICU	2008-03-28	This study	ERS023848	ERR035978	5985_2#3	2949540	41	71940	353352	155855	97.8383	462.592
T126_N1_C7	Adult ICU	2008-03-28	This study	ERS023849	ERR035979	5985_2#4	2944959	46	64020.8	354220	155768	98.1865	410.6
T126_N1_C8	Adult ICU	2008-03-28	This study	ERS023850	ERR035980	5985_2#5	2943941	42	70093.8	350732	156250	98.0258	428.755
T126_N1_C9	Adult ICU	2008-03-28	This study	ERS023851	ERR035981	5985_2#6	2950009	40	73750.2	279424	165865	97.8432	427.557
T126_N1_C10	Adult ICU	2008-03-28	This study	ERS023852	ERR035982	5985_2#7	2946455	38	77538.3	274941	172577	98.0309	387.552
T126_N1_C11	Adult ICU	2008-03-28	This study	ERS023853	ERR035983	5985_2#8	2943627	40	73590.7	382300	191410	98.1327	467.722
T126_N1_C12	Adult ICU	2008-03-28	This study	ERS023854	ERR035984	5985_2#9	2944922	43	68486.6	353050	159052	97.9463	394.382
T126_N1_C15	Adult ICU	2008-03-28	This study	ERS023857	ERR035986	5985_3#1	2941173	38	77399.3	353943	198135	98.1123	539.31
T126_N6_C4	Adult ICU	2008-04-14	This study	ERS023866	ERR035987	5985_3#10	2950621	44	67059.6	356078	190838	97.8961	373.305
T126_N6_C5	Adult ICU	2008-04-14	This study	ERS023867	ERR035988	5985_3#11	2949243	46	64114	355601	136566	98.0671	408.556
T126_N1_C16	Adult ICU	2008-03-28	This study	ERS023858	ERR035989	5985_3#2	2945000	42	70119.1	281080	188312	97.8774	434.258
T126_N1_C17	Adult ICU	2008-03-28	This study	ERS023859	ERR035990	5985_3#3	2948204	44	67004.6	562739	159040	97.9802	472.247
T126_N1_C18	Adult ICU	2008-03-28	This study	ERS023860	ERR035991	5985_3#4	2949111	41	71929.5	378464	159049	98.2773	485.009
T126_N1_C19	Adult ICU	2008-03-28	This study	ERS023861	ERR035992	5985_3#5	2945155	45	65447.9	289137	198122	97.9194	443.959
T126_N1_C20	Adult ICU	2008-03-28	This study	ERS023862	ERR035993	5985_3#6	2945962	41	71852.7	354580	190850	98.0529	447.899
T126_N6_C1	Adult ICU	2008-04-14	This study	ERS023863	ERR035994	5985_3#7	2946924	46	64063.6	367524	156138	98.0123	450.453
T126_N6_C2	Adult ICU	2008-04-14	This study	ERS023864	ERR035995	5985_3#8	2951600	47	62800	264131	159045	98.1022	472.288
T126_N6_C3	Adult ICU	2008-04-14	This study	ERS023865	ERR035996	5985_3#9	2944171	46	64003.7	384553	159049	98.1303	446.652
T126_N6_C6	Adult ICU	2008-04-14	This study	ERS023868	ERR035998	5985_4#1	2947759	43	68552.5	379450	168410	98.0092	364.445
T126_N6_C15	Adult ICU	2008-04-14	This study	ERS023877	ERR035999	5985_4#10	2954090	50	59081.8	299197	138476	97.9167	345.012
T126_N6_C16	Adult ICU	2008-04-14	This study	ERS023878	ERR036000	5985_4#11	2943382	40	73584.6	263367	194375	97.7299	359.952
T126_N6_C7	Adult ICU	2008-04-14	This study	ERS023869	ERR036001	5985_4#2	2952210	38	77689.7	417225	198274	98.0363	392.588
T126_N6_C8	Adult ICU	2008-04-14	This study	ERS023870	ERR036002	5985_4#3	2953359	33	89495.7	439693	211569	97.9738	420.384
T126_N6_C9	Adult ICU	2008-04-14	This study	ERS023871	ERR036003	5985_4#4	2948572	44	67013	279427	159048	98.0039	404.058
T126_N6_C10	Adult ICU	2008-04-14	This study	ERS023872	ERR036004	5985_4#5	2943407	43	68451.3	402663	172351	97.9167	355.089
T126_N6_C11	Adult ICU	2008-04-14	This study	ERS023873	ERR036005	5985_4#6	2945484	42	70130.6	258380	136515	98.0205	379.461
T126_N6_C12	Adult ICU	2008-04-14	This study	ERS023874	ERR036006	5985_4#7	2943676	42	70087.5	353300	159050	98.0338	374.002
T126_N6_C13	Adult ICU	2008-04-14	This study	ERS023875	ERR036007	5985_4#8	2946013	43	68511.9	419551	194476	97.7055	388.283
T126_N6_C14	Adult ICU	2008-04-14	This study	ERS023876	ERR036008	5985_4#9	2947141	47	62705.1	352352	158936	97.6975	371.79
T126_N6_C17	Adult ICU	2008-04-14	This study	ERS023879	ERR036010	5985_5#1	2936761	40	73419	268715	159033	97.6798	444.155
T126_N13_C6	Adult ICU	2008-05-09	This study	ERS023888	ERR036011	5985_5#10	2946370	42	70151.7	353311	193009	98.0911	420.158
T126_N13_C7	Adult ICU	2008-05-09	This study	ERS023889	ERR036012	5985_5#11	2947399	43	68544.2	353625	192413	97.9339	393.454
T126_N6_C18	Adult ICU	2008-04-14	This study	ERS023880	ERR036013	5985_5#2	2943116	44	66889	254617	175613	98.0255	433.749
T126_N6_C19	Adult ICU	2008-04-14	This study	ERS023881	ERR036014	5985_5#3	2948606	43	68572.2	254776	190859	97.9309	488.337
T126_N6_C20	Adult ICU	2008-04-14	This study	ERS023882	ERR036015	5985_5#4	2942359	48	61299.2	353137	158138	98.1008	447.747
T126_N13_C1	Adult ICU	2008-05-09	This study	ERS023883	ERR036016	5985_5#5	2942298	45	65384.4	353419	190835	98.0613	420.626
T126_N13_C2	Adult ICU	2008-05-09	This study	ERS023884	ERR036017	5985_5#6	2947190	42	70171.2	353061	159148	97.7167	428.257
T126_N13_C3	Adult ICU	2008-05-09	This study	ERS023885	ERR036018	5985_5#7	2943128	43	68444.8	353433	159050	97.9474	415.405
T126_N13_C4	Adult ICU	2008-05-09	This study	ERS023886	ERR036019	5985_5#8	2943736	42	70088.9	354457	190882	98.0712	439.428
T126_N13_C5	Adult ICU	2008-05-09	This study	ERS023887	ERR036020	5985_5#9	2944895	44	66929.4	262675	159188	97.9878	443.456
T126_N13_C8	Adult ICU	2008-05-09	This study	ERS023890	ERR036022	5985_6#1	2943389	43	68450.9	353372	158857	98.1236	544.627
T126_N13_C17	Adult ICU	2008-05-09	This study	ERS023899	ERR036023	5985_6#10	2948435	41	71913.1	352788	157340	98.095	434.593
T126_N13_C18	Adult ICU	2008-05-09	This study	ERS023900	ERR036024	5985_6#11	2945813	43	68507.3	353462	181139	98.0882	419.277
T126_N13_C9	Adult ICU	2008-05-09	This study	ERS023891	ERR036025	5985_6#2	2944760	44	66926.4	269355	169004	98.1318	516.278
T126_N13_C10	Adult ICU	2008-05-09	This study	ERS023892	ERR036026	5985_6#3	2948069	43	68559.7	355152	159205	98.1596	625.575
T126_N13_C11	Adult ICU	2008-05-09	This study	ERS023893	ERR036027	5985_6#4	2943854	42	70091.8	353170	161703	97.9848	543.921
T126_N13_C12	Adult ICU	2008-05-09	This study	ERS023894	ERR036028	5985_6#5	2945690	41	71846.1	353893	190850	98.1693	469.341
T126_N13_C13	Adult ICU	2008-05-09	This study	ERS023895	ERR036029	5985_6#6	2943976	44	66908.6	353341	158172	98.1418	460.709
T126_N13_C14	Adult ICU	2008-05-09	This study	ERS023896	ERR036030	5985_6#7	2944208	47	62642.7	244978	138778	98.1426	528.298
T126_N13_C15	Adult ICU	2008-05-09	This study	ERS023897	ERR036031	5985_6#8	2945552	40	73638.8	367267	194390	98.1703	525.419
T126_N13_C16	Adult ICU	2008-05-09	This study	ERS023898	ERR036032	5985_6#9	2944017	42	70095.6	353136	159050	98.0993	479.32
T126_N13_C19	Adult ICU	2008-05-09	This study	ERS023901	ERR036034	5985_7#1	2953682	44	67129.1	259712	158937	98.0238	561.188
T126_N20_C8	Adult ICU	2008-05-31	This study	ERS023910	ERR036035	5985_7#10	2949822	43	68600.5	353353	158934	98.0168	390.661
T126_N20_C9	Adult ICU	2008-05-31	This study	ERS023911	ERR036036	5985_7#11	2938514	66	44522.9	198135	87877	97.002	136.097
T126_N13_C20	Adult ICU	2008-05-09	This study	ERS023902	ERR036037	5985_7#2	2946295	41	71860.9	279432	168305	97.9551	471.584
T126_N20_C1	Adult ICU	2008-05-31	This study	ERS023903	ERR036038	5985_7#3	2946437	41	71864.3	279587	194375	98.0792	609.416
T126_N20_C2	Adult ICU	2008-05-31	This study	ERS023904	ERR036039	5985_7#4	2945586	43	68502	353340	158927	98.0682	560.915
T126_N20_C3	Adult ICU	2008-05-31	This study	ERS023905	ERR036040	5985_7#5	2946084	41	71855.7	279428	190846	97.8012	500.247
T126_N20_C4	Adult ICU	2008-05-31	This study	ERS023906	ERR036041	5985_7#6	2946480	41	71865.4	353356	197404	98.0332	575.178
T126_N20_C5	Adult ICU	2008-05-31	This study	ERS023907	ERR036042	5985_7#7	2944119	40	73603	354287	173746	98	459.631
T126_N20_C6	Adult ICU	2008-05-31	This study	ERS023908	ERR036043	5985_7#8	2946540	37	79636.2	529883	198226	98.1146	564.684
T126_N20_C7	Adult ICU	2008-05-31	This study	ERS023909	ERR036044	5985_7#9	2953193	43	68678.9	356003	193500	98.1789	536.293
T126_N20_C10	Adult ICU	2008-05-31	This study	ERS023912	ERR036046	5985_8#1	2946519	42	70155.2	352983	159386	98.0092	525.081
T126_N20_C19	Adult ICU	2008-05-31	This study	ERS023921	ERR036047	5985_8#10	2946959	41	71877.1	275336	158965	98.1032	515.022
T126_N20_C20	Adult ICU	2008-05-31	This study	ERS023922	ERR036048	5985_8#11	2954344	33	89525.6	470772	207436	97.8855	439.801
T126_N20_C11	Adult ICU	2008-05-31	This study	ERS023913	ERR036049	5985_8#2	2949757	47	62760.8	260755	136891	98.2073	487.867
T126_N20_C12	Adult ICU	2008-05-31	This study	ERS023914	ERR036050	5985_8#3	2944205	43	68469.9	279416	190850	98.0171	516.656
T126_N20_C13	Adult ICU	2008-05-31	This study	ERS023915	ERR036051	5985_8#4	2946409	38	77537.1	354046	206531	98.165	514.791
T126_N20_C14	Adult ICU	2008-05-31	This study	ERS023916	ERR036052	5985_8#5	2941192	43	68399.8	279392	168159	98.0947	492.951
T126_N20_C15	Adult ICU	2008-05-31	This study	ERS023917	ERR036053	5985_8#6	2941207	42	70028.7	353113	205672	98.1239	521.996
T126_N20_C16	Adult ICU	2008-05-31	This study	ERS023918	ERR036054	5985_8#7	2947010	42	70166.9	354698	159149	97.9488	491.732
T126_N20_C17	Adult ICU	2008-05-31	This study	ERS023919	ERR036055	5985_8#8	2949618	40	73740.4	368459	206433	98.1821	547.812
T126_N20_C18	Adult ICU	2008-05-31	This study	ERS023920	ERR036056	5985_8#9	2941784	42	70042.5	279948	158934	98.0964	496.873
S085	ortho female	2007-02-09	Harris et al., 2010	ERS049900	ERR064939	6949_5#42	2947749	56	52638.4	211640	113096	97.586	83.8324
S130	male 2	2007-04-11	Harris et al., 2010	ERS049901	ERR064940	6949_5#43	2959520	54	54805.9	263709	148329	98.8315	89.7454
S087	female 1	2007-02-11	Harris et al., 2010	ERS049902	ERR064941	6949_5#44	2959989	57	51929.6	263380	122206	98.6043	74.8702
S093	icu surgery 2	2007-02-20	Harris et al., 2010	ERS049903	ERR064942	6949_5#45	3003469	40	75086.7	312784	160285	99.0923	77.4688
S071	surgery 4	2007-01-29	Harris et al., 2010	ERS049904	ERR064943	6949_5#46	2975666	59	50435	437932	211567	99.0019	98.2118
S040	picu 2	2006-11-21	Harris et al., 2010	ERS049905	ERR064944	6949_5#47	2955458	38	77775.2	449935	208429	97.7148	72.03
S102	male 1	2007-03-05	Harris et al., 2010	ERS049906	ERR064945	6949_5#48	2961563	39	75937.5	321589	201868	97.9617	92.6494
S007	cvt	2006-10-28	Harris et al., 2010	ERS049907	ERR064946	6949_5#49	2948037	49	60164	386011	158605	97.4004	95.6653
S038	nicu 1	2006-11-21	Harris et al., 2010	ERS049908	ERR064947	6949_5#50	3005792	55	54650.8	300944	159031	99.1646	81.8724
S026	surgery 4	2006-11-11	Harris et al., 2010	ERS049910	ERR064949	6949_5#52	2983088	55	54238	299927	141692	98.0682	94.0377
S097	picu 2	2007-02-26	Harris et al., 2010	ERS049911	ERR064950	6949_5#53	3017800	46	65604.4	299844	159141	98.2291	85.2029
S025	nicu 2	2006-11-10	Harris et al., 2010	ERS049912	ERR064951	6949_5#54	3018324	49	61598.4	299925	145996	98.3923	89.4757
S106	trauma	2007-03-10	Harris et al., 2010	ERS049913	ERR064952	6949_5#55	2985814	43	69437.5	299940	158994	98.111	82.9755
S002	nicu 2	2006-10-18	Harris et al., 2010	ERS049914	ERR064953	6949_5#56	3021126	53	57002.4	326350	142744	98.7111	82.1234
S078	neuro male	2007-02-07	Harris et al., 2010	ERS049915	ERR064954	6949_5#57	2984373	39	76522.4	419819	201948	98.2007	81.9101
S042	icu surgery 1	2006-11-22	Harris et al., 2010	ERS049916	ERR064955	6949_5#58	2986445	38	78590.7	350140	151667	98.1469	104.61
S081	iccu	2007-02-08	Harris et al., 2010	ERS049917	ERR064956	6949_5#59	2983649	41	72771.9	300827	151448	98.2427	84.0814
S024	neuro icu	2006-11-09	Harris et al., 2010	ERS049918	ERR064957	6949_5#60	2986027	45	66356.2	299927	141305	98.2561	106.717
S021	icu cvt	2006-11-06	Harris et al., 2010	ERS049919	ERR064958	6949_5#61	2983803	51	58505.9	280532	141297	98.0428	79.3984
S039	ortho male 2	2006-11-20	Harris et al., 2010	ERS049920	ERR064959	6949_5#62	2983827	45	66307.3	326854	151371	98.3655	77.858
