# Supplementary material for: Genome sequencing defines phylogeny and spread of methicillin-resistant Staphylococcus aureus in a high transmission setting
Source: HighWire-hosted journal article supplement (doi:10.1101/gr.174730.114), 2014-12-09
Supplement: Supplemental_Text.docx [file Supplemental_Text.docx]

**Supplemental Text**

Manuscript Number: GENOME/2014/174730

Title: Genome sequencing defines phylogeny and spread of methicillin-resistant *Staphylococcus aureus* in a high transmission setting

**Study setting**

The two study wards were a general paediatric intensive care unit (ICU) and an adult surgical ICU that provided care to patients with gastroenterological conditions, especially gastrointestinal haemorrhage. The patient to nurse ratio on the study ICUs was 1.3-1.8.The paediatric ICU had 7 beds and 7 cots in open plan, admitted children aged from 1 month to 15 years, and had a bed occupancy rate during the study period of 91%. The distance between the cots and beds ranged from 47cm to 199cm (median distance 109cm). There were 3 handwash basins spaced around the ward. The surgical ICU had 8 beds in open plan, and had a bed occupancy rate during the study period of 102%. The distance between beds ranged from 57cm to 72cm (median 63cm). There were 2 handwash basins at one end of the ward. Patient location was frequently moved within each ICU, but this was not recorded during the study.

**MRSA screening procedure**

Multiple samples were taken from each patient at a given sampling point to increase the sensitivity of MRSA detection. MRSA screening of all study patients consisted of swabbing the anterior nares, throat (or endotracheal suction sample if intubated), axilla, wounds if present (including pressure sores), and catheter urine if catheterised. Swabbing was performed using a pre-moistened sterile cotton-tipped swab within 24 hours of admission, then twice weekly during the length of stay on the study ward and on discharge from this ward. All samples (including nose/throat/axilla) were handled as separate samples. When there was more than one positive sample on a given day, samples were prioritised so that the nasal sample was selected for sequencing if positive. The nasal sample was the isolate used in the majority of cases, including all samples from patient T126. We assumed that the nasal swab sample would be representative of the carriage isolate since the nares is the primary niche for *S. aureus*, but we appreciate that a small number of patients could carry a mixed (polyclonal) *S. aureus* population. Nursing staff had screening nasal swabs and fingertip cultures at 3 unannounced time points over the study period. Fingertips of the dominant hand were cultured by their direct placement onto a Columbia blood agar plate. At the time of original isolation, a single colony was picked from a purity plate and frozen in trypticase soy broth with 15% glycerol at -80°C until recultured for DNA extraction using standard methodology.

**Infection control practice**

At the time of the study, the study site (Sappasithiprasong Hospital) had an infection control policy and an infection control team overseen by a doctor and 2 senior nurses. The responsibility for infection control on each ward was allocated to a member of the ward nursing staff who liaised with the 2 senior nurses. Infection control was included in the hospital’s teaching programme for nursing staff. The hospital diagnostic microbiology laboratory informed the senior nurses responsible for infection control if any cultures grew MRSA or extended spectrum beta-lactamase resistant Gram-negative pathogens, who then investigated for a potential outbreak.

At the time of the study, MRSA screening had never been performed previously.

There were no isolation facilities on either ICU. MRSA positive patients were moved to one end of the row of beds/cots in the ward if possible. MRSA patients were not allocated a specific nurse. Disposable gloves and gloves were used for wound care and procedures involving bodily fluids but aprons were not used. Alcohol handrub was available at the end of each bed on both study ICUs. Covert surveys of hand washing were performed every 2 weeks throughout the study on each study ICU ward using the Hand Hygiene Observation Tool. This demonstrated compliance to be as 0-17% (mean 9%) on the surgical ICU and 0-14% (mean 8%) on the paediatric ICU.
